# Supplementary material for: Mama, mir schmeckt's nicht!
Source: Springer Nature journal article supplement (doi:10.1007/s41906-020-0742-7), 2020-06-06

## Rituale & Regeln am Tisch

zum Beitrag „Mama, mir schmeckt's nicht!“

von Antonia Eccles, Ulrike Landherr, Angelika Mantel und Josef Rosenecker

PflegeZeitschrift (73) 7/2020, S. 20-23

### Wie Sie Ihr Kind darin unterstützen, Hunger und Sättigung besser wahrzunehmen

Ein Tischritual zeigt Beginn und Ende der Mahlzeit an!

- Helfen Sie Ihrem Kind, sich hungrig zu fühlen: Bieten Sie zu **festen Zeiten** die Haupt- und Zwischenmahlzeiten an. Dazwischen sollte eine Pause von mindestens 2 ½ Stunden liegen. Erlauben Sie Ihrem Kind außerhalb der regulären Mahlzeiten und Zwischenmahlzeiten weder einen Snack noch Saft oder Milch. Wenn es Durst hat, bieten Sie ihm lediglich Wasser und ungesüßten Tee an.
- Bieten Sie **kleine Portionen** an und ermöglichen Sie dadurch Ihrem Kind, den Teller leer zu essen und dann einen Nachschlag zu verlangen. Das hilft Ihrem Kind, das Interesse am Essen zu bewahren und verhindert, dass es sich langweilt oder sich von großen Essensmengen überwältigt fühlt. Ihr Kind kann so lernen, zu essen bis es sich satt fühlt.
- Es ist notwendig, dass Sie eine fest vereinbarte Zeit gemeinsam mit Ihrem Kind am Tisch sitzen. Dadurch bekommt Ihr Kind die Möglichkeit, die eigenen Hunger- u. Sättigungssignale wahrzunehmen. Dennoch sollten die Mahlzeiten **nicht länger als 20 bis 30 Minuten** dauern, auch wenn Ihr Kind sehr wenig oder gar nichts gegessen hat. Mit der Zeit wird Ihr Kind lernen, die Nahrungsmenge bei der nächsten Mahlzeit auszugleichen.
- **Schaffen Sie eine positive Atmosphäre am Tisch!!!**
- Kommentieren Sie die angebotenen Speisen unabhängig von Ihrer persönlichen Einschätzung neutral bis **positiv motivierend**. Äußern Sie bitte vor Ihrem Kind keine Bedenken oder negative Prophezeiungen, z.B. „Das isst der sowieso nicht, das schmeckt ja furchtbar ...“. Damit bleibt der Rahmen für das tatsächliche Essensgeschehen offen und wertfrei.
- Auf dem Tisch sollten nicht mehr als **drei verschiedene Nahrungsmittel** pro Mahlzeit stehen. So ist das Angebot übersichtlich, weckt die Neugier und überfordert nicht. Wenn Sie den Tisch mit allen notwendigen Utensilien (Besteck, Teller, Servietten, spezielle Gewürze, Ketchup, Lätzchen ...) gedeckt haben, können Sie mit dem Tischspruch und der Mahlzeit beginnen.

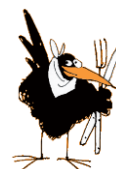

- Gestatten Sie während der Mahlzeiten **keine Ablenkungen** (z. B. Spielsachen, Bücher oder Fernsehen). Wenn Kinder abgelenkt sind, können sie nicht auf ihre inneren Hunger- und Sättigungssignale achten.
  
- **Loben Sie Ihr Kind** für seine Fähigkeit, z.B. selbst zu essen, am Tisch sitzen zu bleiben, Interesse am Essen zu zeigen, aber bleiben Sie neutral, was die Menge des Essens betrifft.  
Kritisieren Sie Ihr Kind nicht dafür, wenn es wenig isst.  
Sehr motivierend ist es, wenn Sie Ihr Kind für jeden Probierversuch und das Interesse am Essen überhaupt positiv verstärken.
  
- Essen sollte nicht als Geschenk, Belohnung, zum Trost oder als Ausdruck von Zuneigung dienen.
  
- Beginnt das Kind während der Mahlzeiten mit dem Essen zu spielen oder zu viel zu reden anstatt zu essen, versuchen Sie es motivierend zum Essen zurückzuführen. Bieten Sie stattdessen eine spezielle Spiel- oder Redezeit außerhalb der Mahlzeiten an. Wenn Ihr Kind von seinem Stuhl aufsteht, mit Essen oder Geschirr um sich wirft oder sich schlecht beträgt, erteilen Sie ihm **EINE Verwarnung**. Wenn es dann nicht hören will, wenden Sie die Time-Out-Methode an.

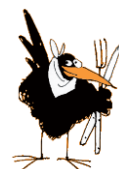

Supplement: MOESM1 [file 18057130]
