# Supplementary material for: Mama, mir schmeckt's nicht!
Source: Springer Nature journal article supplement (doi:10.1007/s41906-020-0742-7), 2020-06-06
Supplement: MOESM2 [file 18057130]

## Fallbeispiel

zum Beitrag „Mama, mir schmeckt's nicht!“

von Antonia Eccles, Ulrike Landherr, Angelika Mantel und Josef Rosenecker

*PflegeZeitschrift* (73) 7/2020, S. 20-23

Emil kam mit 3 Jahren zu uns, weil die Essenssituation für die Familie sehr belastend war. Er erbrach häufig seine Mahlzeiten, wobei er von der Familienkost nur sehr geringe Mengen überhaupt zu sich nahm. Hauptsächlich wurde Emil über die Flasche mit hochkalorischer Milch ernährt, wobei er diese nicht selbstständig führte, sondern von einem Elternteil im Liegen erhielt. Es mussten viele Pausen gemacht werden, da es auch hier zum Erbrechen kam. Zudem war oft Ablenkung mit Handy-Videos nötig, damit Emil die Flasche nicht ganz verweigerte. Im Kindergarten, den er gerne besuchte, nahm er keine Nahrung zu sich. Gewicht, Größe und BMI lagen innerhalb der Perzentilen. Trotzdem hatten die Eltern große Sorge, dass Emil Gewicht abnehmen könnte und darunter z.B. seine Entwicklung oder sein Immunsystem leiden könnten.

Im Anamnesegegespräch erfuhren wir, dass Emils Leben bislang nicht einfach verlaufen war. Die Schwangerschaft, eine durch künstliche Befruchtung entstandene Zwillingschwangerschaft, war von Komplikationen geprägt und ging mit erheblicher Sorge um das Überleben beider Kinder einher. Die Geburt erfolgte zu früh in der 28. Schwangerschaftswoche und Emil wog nur 1100g. Er musste sechs Wochen auf der neonatologischen Intensivstation behandelt werden und wurde bis kurz vor Entlassung über eine nasogastrale Sonde mit Muttermilch ernährt. Stillen klappte bei Trinkschwäche nicht, so dass Emil weiter die Flasche erhielt. Er zeigte keine Hungersignale und die Eltern beherzigten die Empfehlung aus der Klinik, dass sie auf Emils Gewicht achten müssten und dass es ungünstig wäre, wenn er nicht zunähme. Bereits damals spuckte Emil viel, woran auch die Umstellung auf Beikost wenig änderte. Wegen eines vermuteten gastroösophagealen Refluxes erhielt er über einige Monate entsprechende Medikamente, die ebenfalls nur wenig Besserung brachten.

Emil hatte sich bis auf eine leicht verzögerte Sprachentwicklung altersgemäß entwickelt und zeigte ein willensstarkes, aber auch ängstliches Temperament. Die Eltern berichteten von sensorischen Auffälligkeiten in der Hinsicht, dass Emil schnell würgen müsse, z.B. vor Aufregung oder beim Zähneputzen. Emil erhielt bereits Logopädie; die dort erlernten Fortschritte in Bezug auf Kauen und Schlucken konnten jedoch nur mühsam auf die häusliche Situation übertragen werden, sodass in erster Linie die Logopädin zur Behandlung bei uns geraten hatte.

Die psychologische Diagnostik bestätigte die anamnestisch erfragte erhöhte elterliche Belastung, die sich aus fordernden kindlichen Eigenschaften und belasteten elterlichen Funktionen zusammensetzte. In der videogestützten Interaktionsanalyse zeigte sich, dass die Eltern einerseits über gute intuitive Fähigkeiten verfügten und Emil gut motivieren konnten. Andererseits wurden die Ängste um Erbrechen und eine mögliche Gewichtsabnahme immer wieder deutlich und führten zu einem Übermaß an Anforderungen bzgl. der Essensmenge, an Angebot verschiedener Nahrungsmittel sowie zu Unzufriedenheit, wenn Emil kleine Mengen Familienkost selbstständig aß.

Durch die unter engen Absprachen laufende Behandlung im multiprofessionellen Team unter ärztlicher Leitung gelang es, die Eltern zum Perspektivwechsel zu motivieren. Sie konnten ihre Ängste besser reflektieren und durch Beratung durch die Ernährungsfachkraft erkennen, dass Emil ausreichende Mengen an Kalorien und Nährstoffen zu sich nimmt, wenn ihm Autonomie mit sanfter Motivation gewährt wird. Begleitend erhielt Emil Logopädie, Motopädie, Physiotherapie und Musiktherapie, um sensorisch und motorisch gefördert zu werden. Ein Elternteil erhielt musiktherapeutische Tiefenentspannung, um Stress und Belastungen abzubauen und neue Kraft zu schöpfen.

Bei Entlassung nach vier Wochen Behandlung aß Emil bei den fünf täglichen Mahlzeiten (drei Haupt- und zwei Zwischenmahlzeiten) Familienkost mit, wobei auf natürliche Anreicherung durch hochkalorische Nahrungsmittel (z.B. Sahne, Butter, Öl) geachtet wurde. Sowohl Kalorien- wie auch Nährstoffbedarf waren gedeckt. Das Erbrechen trat nicht mehr auf.

Als Empfehlung nahm die Familie mit nach Hause, die Logopädie weiter zu führen und eine Ergotherapie zur Stärkung des Selbstbewusstseins aufzunehmen. Für eine weitere ambulante Therapie wurde empfohlen, sich an die Baby- und Kleinkindersprechstunde der nächstgelegenen Universitätsklinik zu wenden.
