# Supplementary material for: Mama, mir schmeckt's nicht!
Source: Springer Nature journal article supplement (doi:10.1007/s41906-020-0742-7), 2020-06-06
Supplement: MOESM3 [file 18057130]

# Weiterführende Elterninformationen

zum Beitrag „Mama, mir schmeckt's nicht!“

von Antonia Eccles, Ulrike Landherr, Angelika Mantel und Josef Rosenecker

PflegeZeitschrift (73) 7/2020, S. 20-23

## Elterninformation<sup>1</sup>

### Infantile Anorexie

#### Beschreibung:

- Das zentrale Problem bei einem Kind mit infantiler oder frühkindlicher Anorexie ist ihr Appetitmangel („Anorexie“), der dazu führt, dass die Kinder kein Interesse am Füttern/Essen<sup>1</sup> haben und Nahrung verweigern.
- Die infantile Anorexie hat - außer dem Appetitmangel - mit der bei Jugendlichen bekannten Anorexia nervosa nichts zu tun.
- Die infantile Anorexie setzt vor dem 3. Lebensjahr, am häufigsten im Alter zwischen 6 und 18 Monaten ein, wenn die kindliche Umwelt zunehmend interessanter wird, und das Kind zur Löffelkost und zum Selber-essen übergeht.
- Ein Kind mit infantiler Anorexie zeigt selten Hungersignale und wenn, dann reichen diesem Kind kleinste Mengen Nahrung, um den Hunger zu stillen.
- Die Kinder nehmen nur ein paar Bissen zu sich und weigern sich dann, weiter zu essen. Die Bissen reichen, um den größten Hunger zu stillen. Die Kinder essen nicht so lange weiter, bis sie wirklich satt sind. Manche haben nach kurzer Zeit wieder Hunger.
- Wenn der schlimmste Hunger gestillt ist, lassen sich die Kinder leicht von allem ablenken und lenken sich selbst ab, da alles andere interessanter als Essen ist. Manche möchten auch von ihrem Platz aufstehen und herumlaufen oder spielen.
- Die meisten Kinder mit infantiler Anorexie weisen ein Wachstumsdefizit auf, da sie keine ausreichenden Mengen zu sich nehmen.
- Da die Eltern sich meist Sorgen um das schlechte Wachstum ihrer Kinder machen, haben sie das Gefühl, sie müssten sie durch gutes Zureden, Ablenkungen, Drohungen und Unterhaltungsangebote dazu bringen, etwas zu essen. Diese Methoden können anfangs sogar funktionieren, doch auf lange Sicht sind sie keine Lösung. Je ausgeprägter diese Verhaltensweisen bei den Mahlzeiten werden, desto mehr verlieren die Kinder die Fähigkeit, ihr Hungergefühl wahrzunehmen, und ihre Nahrungsaufnahme wird von außen - durch die Eltern - reguliert.

#### Erklärung:

Die Hungersignale werden nicht wahrgenommen oder, bei den meist sehr aktiven und explorationsfreudigen Kindern, von anderen Bedürfnissen (Spielen, Aktivität, etc.) überlagert. Auch wird dementsprechend kein Sättigungsgefühl wahrgenommen.

---

<sup>1</sup> Quelle: **Chatoor, Irene.** *Fütterstörungen bei Säuglingen und Kleinkindern.* Stuttgart : Klett-Cotta, 2012. ISBN: 978-3-608-94718-2.

Die Kinder laufen meist im „Turbogang“ und haben Schwierigkeiten, sich soweit selbst zu regulieren, um ein Spiel zu unterbrechen oder sich zum Essen etwas zu entspannen.

**Behandlung:**

- Ziel der Therapie: Die innere Regulation beim Kind zu fördern.
- Um stärkere Hungergefühle zu erzeugen: Abstand von 3-4h zwischen den Mahlzeiten, dazwischen keinerlei Snacks, Milch oder gesüßte Getränke. Wenn das Kind Durst hat, sollte man ihm Wasser anbieten.
- Um das Interesse am Essen wach zu halten: Sehr kleine Portionen anbieten, damit das Kind nachfordern muss.
- Das Kind soll solange am Tisch sitzen bleiben „bis Mamas oder Papas Bauch voll ist“ (in der Regel 20 bis max. 30 Minuten)
- Weitere Essensregeln und evtl. Time-out-Methode

# Posttraumatische Fütterstörung

## Beschreibung:

- Ein Kind mit einer posttraumatischen Fütterstörung reagiert mit Angst und intensivem Widerstand auf die Aufnahme fester Nahrung oder das Trinken aus der Flasche. In schweren Fällen verweigert es unter Umständen jegliche Nahrungsaufnahme.
- Die Weigerung des Kindes, feste Nahrung zu sich zu nehmen, oder aus der Flasche zu trinken, ist nach einem (oder mehreren) Ereignissen eingetreten, bei dem das Kind sich verschluckt hat, würgen oder erbrechen musste oder zwangsgefüttert wurde. Das Ereignis war mit starkem kindlichen Stress verbunden.
- Eine solche Weigerung kann auch nach traumatisch erlebten Einführungen von Nasensonden, einer Intubationen, Absaugen oder einem chirurgischen Eingriff im Mund-Rachenraum erfolgen.
- Die Verweigerung kann sehr lange andauern und sehr hartnäckig sein, auch wenn das Ereignis längst vorbei ist.
- Falls das traumatische Erlebnis mit dem Essen fester Nahrung verknüpft ist, wird das Kind möglicherweise die Milch, die es vorher hatte, akzeptieren (und umgekehrt).
- Erinnerungen an die traumatischen Ereignisse (z.B. Nahrungsmittel, Farbe, Konsistenz eines Nahrungsmittels oder auch Flasche etc.) verursachen bereits Stress und Ängste beim Kind und führen zu Verweigerung.
- Ein Kind mit einer posttraumatischen Fütterstörung leistet Widerstand gegen Gefüttert werden, indem es schreit, sich abwendet oder überstreckt und sich weigert, den Mund zu öffnen
- Wenn es den Mund öffnet, kann es sein, dass es Widerstand gegen das Schlucken der Speise leistet und diese wieder ausspuckt oder im Mund behält und später ausspuckt.
- Die Abneigung ist meist größer als jedes Hungergefühl.

## Erklärung:

Die Nahrungsverweigerung wird ausgelöst durch Angst vor dem Essen, da das Essen mit dem „schlimmen“ Erlebnis verknüpft ist und das Kind Angst hat, durch Essen erneut in eine „schlimme“ Situation zu geraten.

## Behandlung:

- Evtl. vorhandene körperliche Erkrankung behandeln.
- Ernährungszustand des Kindes ermitteln, Plan für adäquate Nahrungsaufnahme aufstellen (evtl. mit Ersatznahrung).
- Angstausslösende Nahrungsmittel zunächst weglassen, dem Kind das zu essen geben, was es akzeptiert (wovon es keine Angst hat)
- „Graduelle Desensibilisierung“: Schrittweise die mit Angst besetzten Nahrungsmittel anbieten (kleine Mengen, Eltern essen dasselbe)
- Positive Atmosphäre beim Essen schaffen, keinerlei Druck oder Zwang ausüben
- Ca. 3-4h Pause zwischen den Mahlzeiten lassen, um dem Kind ein Hungergefühl zu ermöglichen
- Ersatznahrung am Ende der Mahlzeit geben, nicht außerhalb der Essenzeiten

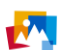

# Sensorische Nahrungsverweigerung

## Beschreibung:

- Ein Kind mit einer Sensorischen Nahrungsverweigerung lehnt es konsequent ab, bestimmte Nahrungsmittel zu essen. Die Verweigerung hängt mit dem Geschmack, der Textur, dem Geruch, der Temperatur und/oder dem Aussehen des Essens zusammen. Es können einige wenige spezielle Speisen oder aber ganze Gruppen von Nahrungsmitteln abgelehnt werden.
- Die Reaktionen auf die angstbesetzten (aversiven) Nahrungsmittel reichen vom Verziehen des Gesichts bis hin zum Würgen, Erbrechen oder Ausspucken der Nahrung, während die bevorzugten Speisen gut gegessen werden.
- Die Nahrungsverweigerung entsteht, wenn ein Kind erstmals die Erfahrung einer aversiven Reaktion auf eine bestimmte Speise macht.
- Meist probieren diese Kinder nur widerstrebend neue Speisen aus (sog. Neophobie).
- Manche Kinder sind so empfindlich, dass sie sich weigern, Nahrungsmittel zu essen, die mit anderen Nahrungsmitteln auf ihrem Teller in Berührung gekommen sind, während andere nur Speisen in einer bestimmten Verpackung oder von bestimmten Herstellern essen.
- Manche Kinder haben Angst vor bestimmten Nahrungsmitteln oder vor dem Essen an sich.
- Wenn diese Kinder Nahrungsmittel verweigern, die ein gründliches Kauen erfordern, verzögert sich die Entwicklung ihrer Mundmotorik, was auch die Sprachentwicklung beeinflussen kann.
- Manchmal erstrecken sich die Empfindlichkeiten auch auf andere Bereiche (barfuß laufen, Abneigung gegen Berühren/Riechen bestimmter Nahrungsmittel oder andere Dinge, laute Geräusche, helles Licht, Zähne putzen, Haare waschen)

## Erklärung:

- Menschen nehmen Sinneseindrücke unterschiedlich intensiv wahr. Kinder mit Sensorischer Nahrungsverweigerung gehören oft zu den „Superschmeckern“ und können meist auch mit ihrer Zunge besser tasten und fühlen -> Sie sind wesentlich empfindlicher.
- Oft neigen diese Kinder auch in anderen Bereichen zu erhöhter Vorsichtigkeit und Ängstlichkeit. (genetisch bedingt)
- Gen-Umwelt-Interaktionsmodell

## Behandlung:

- Aufklärung über Art und Ursache der Fütterstörung
- Nahrungsmittel, die starke Abneigung hervorrufen (ausspucken, würgen, erbrechen): Nicht mehr vorsetzen, sonst wird Aversion eher verstärkt
- Bei wenig Abneigung (Gesicht verziehen): Wieder anbieten, evtl. mit bevorzugter Speise zusammen. Allmähliche Steigerung über mehrere Mahlzeiten.
- Eltern als Vorbild beim Probieren; lieber warten, bis das Kind selbst fragt, ob es probieren darf, es dem Kind schwer machen („Das ist Mamas Essen, aber du darfst ein kleines Stückchen haben“) und dann neutral bleiben, ob das Kind die Speise mag oder nicht (Kind hat Kontrolle, kein Machtkampf)
- Bei zu einseitiger Nährstoffversorgung: evtl. Nahrungsergänzungsmittel

- Essensregeln etablieren, um innere Regulation zu fördern
- Um stärkere Hungergefühle zu erzeugen: Abstand von 3-4h zwischen den Mahlzeiten, dazwischen keinerlei Snacks, Milch oder Saft/gesüßte Getränke. Wenn das Kind Durst hat, sollte man ihm Wasser anbieten.
- Um das Interesse am Essen wach zu halten und Überforderung zu vermeiden: Sehr kleine Portionen anbieten, damit das Kind nachfordern muss.
- Das Kind soll solange am Tisch sitzen bleiben „bis Mamas oder Papas Bauch voll ist“ (in der Regel 20 bis max. 30 Minuten), damit es Gelegenheit hat, ausreichend zu essen (wobei das Kind bestimmen darf, was ausreichend ist)
- Kein Lob oder keine Kritik, wie viel/wie wenig das Kind gegessen hat, Essen soll kein „Leistungstest“ sein; Lob für selbstständiges Essen, gutes Bemühen oder den Mut, etwas probiert zu haben, darf sein und tut gut
- Keine Ablenkung durch Spielsachen oder Fernsehen, da Kinder dann keine Chance haben, auf ihre inneren Signale zu achten
- Essen nicht als Belohnung oder als Ausdruck von Zuneigung einsetzen, „Nachtisch“ oder Süßes in kleinen Mengen gleichzeitig mit dem Essen anbieten, damit es den besonderen Charakter verliert
- Herumwerfen von Essen oder Geschirr unterbinden. Ältere Kinder sollen nicht mit Essen spielen (anfassen, evtl. mit den Fingern essen oder probieren, riechen, schlecken und mit allen Sinnen wahrnehmen ist dagegen erlaubt und erwünscht).
- Bei allzu viel Ablenkung: Kind aufs Essen re-fokussieren, Gespräche auf nach dem Essen verschieben.
- Bei grobem Fehlverhalten des Kindes (z.B. vom Tisch aufstehen, Essen oder Besteck herumwerfen): Time-out-Methode einsetzen
